# Supplementary material for: Calomys callosus: An Experimental Animal Model Applied to Parasitic Diseases Investigations of Public Health Concern
Source: MDPI journal article supplement (doi:10.3390/pathogens11030369), 2022-03-17
Supplement: s1 [file s1]

**Table S1.** Current findings using *C. callosus* as an experimental model to study parasitic diseases.

| Parasite                 | Strain                            | Animal age      | Dose                                                                                                  | Route of infection              | Infection time                       | Major findings                                                                                                                                                                                                              | Reference |
|--------------------------|-----------------------------------|-----------------|-------------------------------------------------------------------------------------------------------|---------------------------------|--------------------------------------|-----------------------------------------------------------------------------------------------------------------------------------------------------------------------------------------------------------------------------|-----------|
| <i>Toxoplasma gondii</i> | RH                                | 8 weeks old     | 10 <sup>2</sup> , 10 <sup>3</sup> , 10 <sup>4</sup> , 10 <sup>5</sup> and 10 <sup>6</sup> tachyzoites | Intraperitoneal                 | 3 and 9 days                         | <i>C. callosus</i> demonstrated to be highly susceptible to parasitic infection; massive presence of extracellular parasites in the peritoneal cavity, and high parasite load in spleen, lung, intestine, brain, and kidney | 23        |
|                          | RH                                | 12 weeks old    | 10 <sup>5</sup> tachyzoites                                                                           | Intraperitoneal                 | 1, 3, 6, 12, 24, 36 and 48 hours     | Mast cells are an important cell type involved with the acute phase of the inflammatory response against <i>T. gondii</i>                                                                                                   | 24        |
|                          | TgChBrUD1 and TgChBrUD2           | -               | 10 <sup>2</sup> tachyzoites                                                                           | Intraperitoneal                 | 8 and 15 days                        | <i>C. callosus</i> is susceptible to parasite infection with gender differences in severity of infection, regardless of <i>T. gondii</i> strain                                                                             | 25        |
|                          | ME49                              | 8-12 weeks old  | 20 cysts                                                                                              | Oral                            | 15, 16, 17, 18, 19 and 21 days       | Males and virgin females (acquired form), and pregnant females (congenital form) of <i>C. callosus</i> developed severe ocular lesions with presence of cysts, free tachyzoites and inflammatory cells in the retina        | 32        |
|                          | RH                                | 60 days old     | 10 <sup>2</sup> or 10 <sup>3</sup> tachyzoites                                                        | Intraperitoneal or conjunctival | 24 hours and 5 days                  | Enucleated eyes of <i>C. callosus</i> presented tachyzoites, inflammatory cells and vasodilatation after parasite infection                                                                                                 | 33        |
|                          | RH                                | 12-16 weeks old | 10 <sup>2</sup> tachyzoites                                                                           | Intraperitoneal                 | 7 days after pregnancy               | <i>T. gondii</i> is capable of infecting trophoblast cells in the early stage of pregnancy of <i>C. callosus</i>                                                                                                            | 38        |
|                          | ME49                              | 12-16 weeks old | 20 cysts                                                                                              | Oral                            | 100 days and 20 days after pregnancy | Vertical transmission of <i>T. gondii</i> occurs in acutely infected pregnant of <i>C. callosus</i> , but not in the chronic phase of the infection                                                                         | 11        |
|                          | ME49                              | -               | 20 cysts                                                                                              | Oral                            | 17 and 20 days after pregnancy       | Susceptibility to vertical transmission of <i>T. gondii</i> is temporally dependent on the preconceptional infection in <i>C. callosus</i>                                                                                  | 39        |
|                          | ME49, RH, TgChBrUD1 and TgChBrUD2 | -               | 20 cysts; 10 <sup>2</sup> tachyzoites                                                                 | Oral or intraperitoneal         | 19 days after pregnancy              | <i>C. callosus</i> females chronically infected with <i>T. gondii</i> when reinfected during pregnancy resulted in the vertical transmission                                                                                | 46        |
|                          | ME49                              | -               | 20 cysts                                                                                              | Oral                            | 35 days                              | The antibiotic enrofloxacin diminished the tissue parasitism as well as the inflammatory alterations in the brain of <i>C. callosus</i> infected with <i>T. gondii</i>                                                      | 57        |
|                          | ME49                              | 12 weeks old    | 20 cysts                                                                                              | Oral                            | 15 and 20 days after pregnancy       | Azithromycin inhibited                                                                                                                                                                                                      | 55        |

|                               |                                       |                 |                                                                                                        |                   |                                |                                                                                                                                                                                                                                                                                                                                                                                                                                                                                                                            |    |
|-------------------------------|---------------------------------------|-----------------|--------------------------------------------------------------------------------------------------------|-------------------|--------------------------------|----------------------------------------------------------------------------------------------------------------------------------------------------------------------------------------------------------------------------------------------------------------------------------------------------------------------------------------------------------------------------------------------------------------------------------------------------------------------------------------------------------------------------|----|
|                               |                                       |                 |                                                                                                        |                   |                                | the vertical transmission of <i>T. gondii</i> in females of <i>C. callosus</i>                                                                                                                                                                                                                                                                                                                                                                                                                                             |    |
|                               | ME49                                  | 12-16 weeks old | 20 cysts                                                                                               | Oral              | 15 and 19 days after pregnancy | Azithromycin reduced the parasite load in the brain of mothers, and no parasites were detected in eyes of fetuses from <i>C. callosus</i>                                                                                                                                                                                                                                                                                                                                                                                  | 56 |
| <i>Leishmania amazonensis</i> | Isolate human case (Brasília, Brasil) | 2-3 months old  | 0.1 ml of tritu of amastigote lesions                                                                  | Subcutânea        | 3,5 month                      | The lesions manifested at the application sites from the 40th day post-infection (dpi) and the presence of the parasite was confirmed by smears of these tissues                                                                                                                                                                                                                                                                                                                                                           | 16 |
| <i>Leishmania infantum</i>    | Isolate human case (Maranhão, Brasil) | 2 months old    | 0.1 ml of a homogenate in sterile saline, from a homologous animal's spleen, rich in amastigote shapes | *                 | 3 month                        | Animals low body weight. Splenomegaly was also recorded. " <i>In vitro</i> " cultures were positive liver and spleen in 67% of the animals. Blood tests were negative. Histological studies of unaltered liver Kupffer cell proliferation and granulomatous reaction in portal areas with multinucleated cells and amastigote forms of the parasites. Loss of follicular pattern with parasitism in a large number of cells around which where granulomatous reactions were observed in the spleen                         | 17 |
|                               | R52, R64, R65 e M226                  | 34-48 days old  | 0,1 ml of solution (ratio: 50% barber bug fecal material and 50% saline)                               | Intraperitoneally | 63 days                        | The results obtained in the experiments performed with <i>C. callosus</i> are important data in demonstrating the ability of the species to maintain a patent, regular and long parasitemia for the four strains studied. <i>C. callosus</i> inoculated with the three strains (R52, R64 and R65) were more sensitive in acquiring the infection, with parasitemia peaks of up to 7,632 parasites/5mm <sup>3</sup> , even with low lethality, while for the M226 strain the parasitemia peaks were low and lethality zero. | 74 |
| <i>Trypanosoma cruzi</i>      | R52, R64, R65 e M226                  | 26-36 days old  | 10 <sup>4</sup> metacyclic trypomastigotes                                                             | Intraperitoneally | 6 and 18 days                  | Although it is believed that the maintenance of <i>T. cruzi</i> "in vitro" contributed to the loss of infective power and virulence of the pathogen, the results obtained showed that there was no complete loss of infective capacity, since <i>C. callosus</i> showed positive results, high parasitemia although irregular in some animals, and prepatency                                                                                                                                                              | 75 |

|                            |                                               |                      |                              |                   |                                |                                                                                                                                                                                                                                                                                                                                                                                                                                                                                  |    |
|----------------------------|-----------------------------------------------|----------------------|------------------------------|-------------------|--------------------------------|----------------------------------------------------------------------------------------------------------------------------------------------------------------------------------------------------------------------------------------------------------------------------------------------------------------------------------------------------------------------------------------------------------------------------------------------------------------------------------|----|
|                            |                                               |                      |                              |                   |                                | between 6.0 to 8.6 days. The lethality in these animals was zero.                                                                                                                                                                                                                                                                                                                                                                                                                |    |
|                            | R52, R64 e R65                                | *                    | 10.000<br>trypomastigote     | Intraperitoneally | 30-60 days                     | Female <i>C. callosus</i> were infected with <i>T. cruzi</i> trypomastigote. Upon reaching the chronic phase, these females started to breed and 90 neonates were analyzed by blood tests and xenodiagnosis. The results obtained were positive for infection even with a low parasitemia in the neonates, however, it was not possible by the nature of the experiments to determine whether <i>T. cruzi</i> was transmitted to the neonates via transplacental or breast milk. | 83 |
| <i>Trypanosoma lewis</i>   | *                                             | *                    | 0.1 ml. of blood<br>infected | Intraperitoneally | 45-60 days                     | All experimentally inoculated <i>C. callosus</i> were infected, presenting a high parasitemia while the attempts to infect other rodents were unsuccessful. The results of experimental inoculations suggest a high degree of host specificity of <i>T. lewis</i> and validate the trypanosome described.                                                                                                                                                                        | 79 |
|                            | Isolate human<br>case (Pernambuco,<br>Brazil) | 2-3<br>months<br>old | 45 cercarie                  | Transcutaneous    | 50 days                        | The animals were positive in the coprological exams, up to the 50th day after inoculations. The coprological evaluation also applies that the pre-patent period took place between 43 to 44 days                                                                                                                                                                                                                                                                                 | 16 |
|                            | B. glabrata-BH                                | 5 days old           | 70 cercarie                  | Percutaneous      | 42,45,55,80,90 and<br>160 days | Infected animals presented fibrovascular lesions found in the intestinal subserosa region between 55 and 160 days after infection.                                                                                                                                                                                                                                                                                                                                               | 93 |
|                            | B. glabrata-BH                                | 5 days old           | 70 cercarie                  | Percutaneous      | 42 days                        | Infected <i>C. callosus</i> developed prominent intestinal subserous nodules with diffuse granular features                                                                                                                                                                                                                                                                                                                                                                      | 94 |
| <i>Schistosoma mansoni</i> | *                                             | 5 days old           | 70 cercarie                  | Percutaneous      | 42,55, 90, 160 and<br>229      | Omental milky spots from infected animals were found in lymphomyelocytic cells between 42 and 90 days after infection and lymphoplasmocytic cells 160 days after infection. Lymphoid follicles with germinal centers, plasmacytogenesis and plasmacytosis, mastocytosis, megakaryopoiesis, erythropoiesis and less eosinopoiesis were also observed.                                                                                                                             | 97 |
